# Supplementary material
Source: publisher site journal article supplement (https://www.dovepress.com/get_supplementary_file.php?f=233795.docx)
Supplement: Supplementary file 1 [file get_supplementary_file.php]

Supplementary Table S1. PCR primers for *Klebsiella pneumoniae* MLST typing

| Gene | Primer | Nucleotide sequence (5’-3’) |
| --- | --- | --- |
| *rpoB* | RpoB-F | GTTTTCCCAGTCACGACGTTGTAGGCGAAATGGCWGAGAACCA |
| RpoB-R | TTGTGAGCGGATAACAATTTCGAGTCTTCGAAGTTGTAACC |
| *gapA* | gapA-F | GTTTTCCCAGTCACGACGTTGTATGAAATATGACTCCACTCACGG |
| gapA-R | TTGTGAGCGGATAACAATTTCCTTCAGAAGCGGCTTTGATGGCTT |
| *mdh* | mdh-F | GTTTTCCCAGTCACGACGTTGTA CCCAACTCGCTTCAGGTTCAG |
| mdh-R | TTGTGAGCGGATAACAATTTCCCGTTTTTCCCCAGCAGCAG |
| *pgi* | pgi-F | GTTTTCCCAGTCACGACGTTGTAGAGAAAAACCTGCCTGTACTGCTGGC |
| pgi-R | TTGTGAGCGGATAACAATTTCCGCGCCACGCTTTATAGCGGTTAAT |
| *phoE* | phoE-F | GTTTTCCCAGTCACGACGTTGTAACCTACCGCAACACCGACTTCTTCGG |
| phoE-R | TTGTGAGCGGATAACAATTTCTGATCAGAACTGGTAGGTGAT |
| *infB* | infB-F | GTTTTCCCAGTCACGACGTTGTACTCGCTGCTGGACTATATTCG |
| infB-R | TTGTGAGCGGATAACAATTTC CGCTTTCAGCTCAAGAACTTC |
| *tonB* | tonB-F | GTTTTCCCAGTCACGACGTTGTACTTTATACCTCGGTACATCAGGTT |
| tonB-R | TTGTGAGCGGATAACAATTTCATTCGCCGGCTGRGCRGAGAG |
